# Supplementary material
Source: PubMed Central journal article supplement (PMC3728180)
Supplement: NIHMS441522-supplement-01.pdf [file NIHMS441522-supplement-01.pdf]

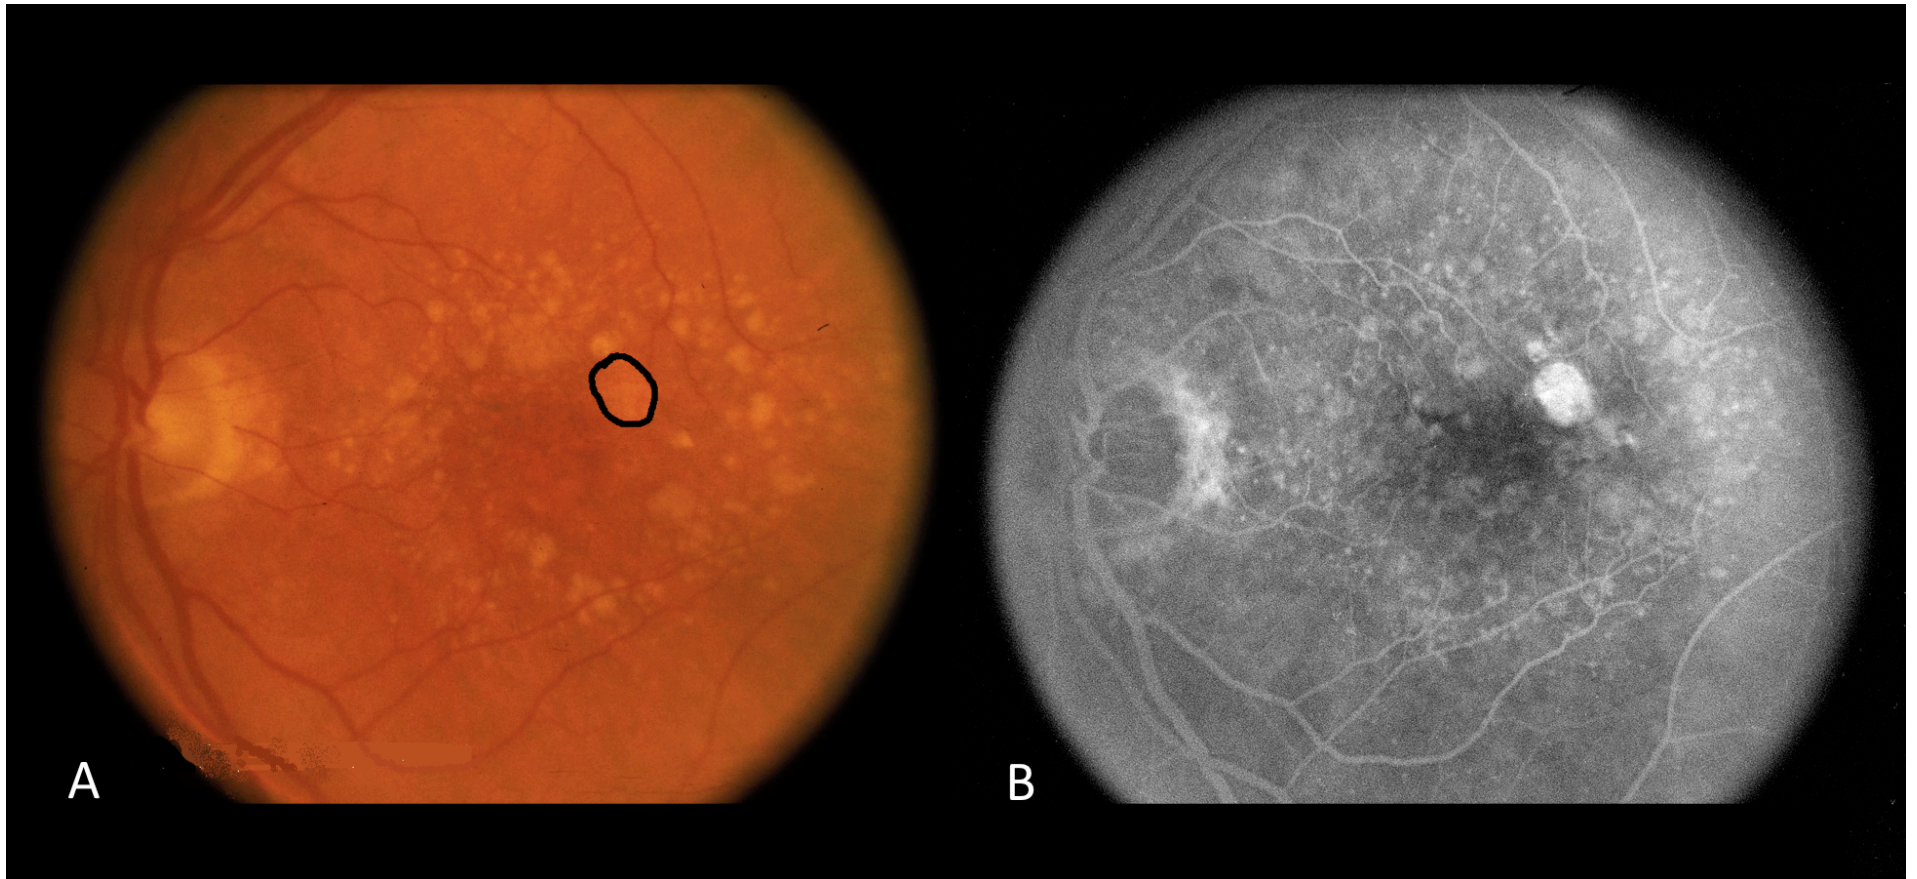

**Figure 2:** Median size of incident geographic atrophy ( $0.26\text{mm}^2$ ). **(A)** Color fundus photograph demonstrating the median size geographic atrophy lesion at initial detection. **(B)** Corresponding fluorescein angiogram.
